# Supplementary material for: Molecular Prevalence of Equine Parvovirus-Hepatitis in the Sera of Clinically Healthy Horses in South Korea
Source: MDPI journal article supplement (doi:10.3390/vetsci8110282), 2021-11-19
Supplement: s1 [file s1]

## Supporting Material

# Molecular Prevalence of Equine Parvovirus-Hepatitis in the Sera of Clinically Healthy Horses in South Korea

Sang-Kyu Lee <sup>1</sup>, Dongsun Park <sup>2</sup> and Inhyung Lee <sup>3,\*</sup>

**Table S1.** Detailed race results of Thoroughbred race horses used for the analysis of the relevance between performance levels and EqPV-H infection.

| Sample | KRA property | Breed        | Purpose | Age | Race day<br>(year-month-day) | Rank | Number of participants | Race rank percentage <sup>1</sup> | Performance level | EqPV-H infection |
|--------|--------------|--------------|---------|-----|------------------------------|------|------------------------|-----------------------------------|-------------------|------------------|
| KRA57  | KRA Seoul    | Thoroughbred | Racing  | 5   | 2021-05-16                   | 11   | 11                     | 100.0%                            | Low level         | positive         |
| KRA58  | KRA Seoul    | Thoroughbred | Racing  | 4   | 2021-05-16                   | 2    | 11                     | 18.2%                             | High level        | positive         |
| KRA60  | KRA Seoul    | Thoroughbred | Racing  | 4   | 2021-05-16                   | 7    | 11                     | 63.6%                             | Moderate level    | positive         |
| KRA62  | KRA Seoul    | Thoroughbred | Racing  | 4   | 2021-05-16                   | 12   | 12                     | 100.0%                            | Low level         | positive         |
| KRA66  | KRA Seoul    | Thoroughbred | Racing  | 5   | 2021-05-16                   | 6    | 9                      | 66.7%                             | Moderate level    | positive         |
| KRA68  | KRA Seoul    | Thoroughbred | Racing  | 4   | 2021-05-16                   | 2    | 9                      | 22.2%                             | High level        | positive         |
| KRA106 | KRA Seoul    | Thoroughbred | Racing  | 5   | 2021-05-22                   | 10   | 12                     | 83.3%                             | Low level         | positive         |
| KRA129 | KRA Seoul    | Thoroughbred | Racing  | 5   | 2021-05-23                   | 8    | 11                     | 72.7%                             | Low level         | positive         |
| KRA151 | KRA Seoul    | Thoroughbred | Racing  | 7   | 2021-05-23                   | 10   | 14                     | 71.4%                             | Low level         | positive         |
| KRA270 | KRA Busan    | Thoroughbred | Racing  | 4   | 2021-06-12                   | 6    | 10                     | 60.0%                             | Moderate level    | positive         |
| KRA289 | KRA Busan    | Thoroughbred | Racing  | 4   | 2021-06-13                   | 7    | 14                     | 50.0%                             | Moderate level    | positive         |

|        |              |              |        |   |            |   |    |       |                   |          |
|--------|--------------|--------------|--------|---|------------|---|----|-------|-------------------|----------|
| KRA14  | KRA<br>Seoul | Thoroughbred | Racing | 5 | 2021-05-16 | 4 | 12 | 33.3% | High level        | negative |
| KRA47  | KRA<br>Seoul | Thoroughbred | Racing | 4 | 2021-05-16 | 3 | 13 | 23.1% | High level        | negative |
| KRA49  | KRA<br>Seoul | Thoroughbred | Racing | 5 | 2021-05-16 | 9 | 13 | 69.2% | Low level         | negative |
| KRA61  | KRA<br>Seoul | Thoroughbred | Racing | 5 | 2021-05-16 | 8 | 11 | 72.7% | Low level         | negative |
| KRA64  | KRA<br>Seoul | Thoroughbred | Racing | 4 | 2021-05-16 | 1 | 9  | 11.1% | High level        | negative |
| KRA71  | KRA<br>Seoul | Thoroughbred | Racing | 6 | 2021-05-16 | 7 | 11 | 63.6% | Moderate<br>level | negative |
| KRA105 | KRA<br>Seoul | Thoroughbred | Racing | 3 | 2021-05-22 | 4 | 13 | 30.8% | High level        | negative |
| KRA110 | KRA<br>Seoul | Thoroughbred | Racing | 4 | 2021-05-23 | 3 | 12 | 25.0% | High level        | negative |
| KRA140 | KRA<br>Seoul | Thoroughbred | Racing | 6 | 2021-05-23 | 2 | 11 | 18.2% | High level        | negative |
| KRA246 | KRA<br>Busan | Thoroughbred | Racing | 3 | 2021-06-12 | 7 | 14 | 50.0% | Moderate<br>level | negative |
| KRA277 | KRA<br>Busan | Thoroughbred | Racing | 5 | 2021-06-13 | 3 | 14 | 21.4% | High level        | negative |

<sup>1</sup> The percentage of rank divided by the number of participating animals in the race.
